# Supplementary material for: Routine Neuroimaging in Patients with Stage IV Non-Small Cell Lung Cancer: A Single Center Experience
Source: MDPI journal article supplement (doi:10.3390/curroncol28020108), 2021-03-02
Supplement: s1 [file s1]

Supplementary Materials

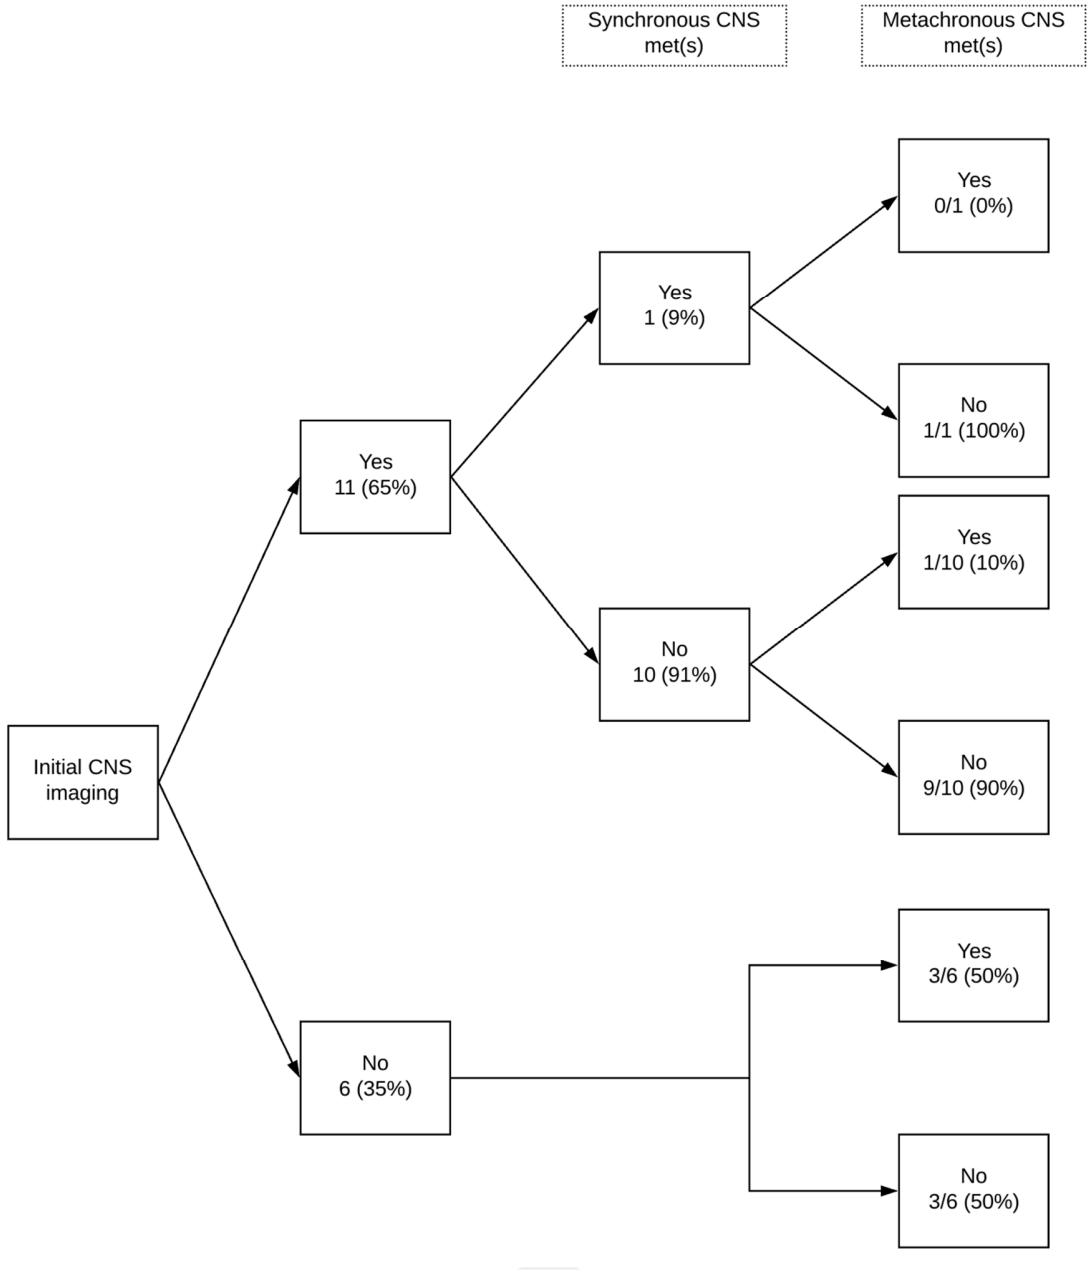

**Figure S1.** Synchronous and metachronous CNS metastases (*EGFR*-mutated NSCLC).

CNS = central nervous system; EGFR = epidermal growth factor receptor; met = metastasis; NSCLC = non-small cell lung cancer.

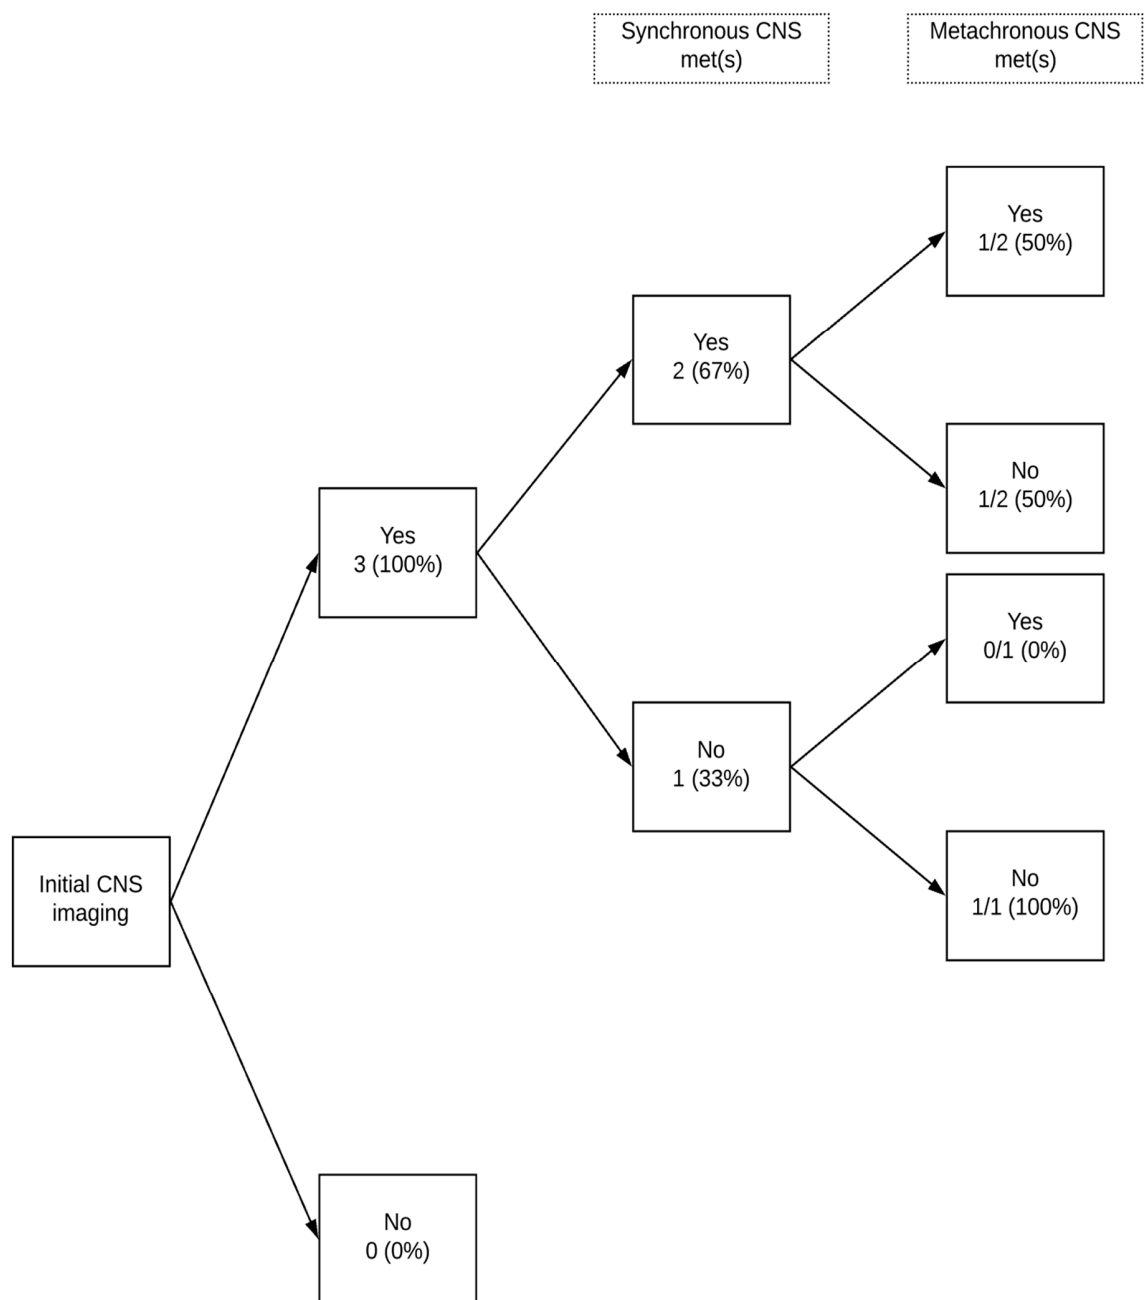

**Figure S2.** Synchronous and metachronous CNS metastases (*ALK*-rearranged NSCLC).

*ALK* = anaplastic lymphoma kinase; CNS = central nervous system; met = metastasis; NSCLC = non-small cell lung cancer.
